# Supplementary material for: The impact of data quality and source data verification on epidemiologic inference: a practical application using HIV observational data
Source: Springer Nature journal article supplement (doi:10.1186/s12889-019-8105-2), 2019-12-01
Supplement: MOESM1 [file 17678944]

Supplemental Tables and Figures for The impact of data quality and source data verification on epidemiologic inference: a practical application using HIV observational data

Supplemental Table 1: Complete list of study variables with descriptions.

| Variable                         | Description                                   | Source     | Dataset   |         |            | Variable Audited in 2008-09 |
|----------------------------------|-----------------------------------------------|------------|-----------|---------|------------|-----------------------------|
|                                  |                                               |            | Pre-Audit | Audited | Post-Audit |                             |
| <i>birth_date</i>                | Birth date                                    | tblBasic   | Yes       | Yes     | Yes        | Yes                         |
| <i>male</i>                      | Gender at birth (0-Female, 1-Male, 9-Unknown) | tblBasic   | Yes       | Yes     | Yes        | Yes                         |
| <i>mode</i>                      | Probable Mode of Infection                    | tblBasic   | Yes       | Yes     | Yes        | Yes                         |
| <i>aids_y</i>                    | AIDS dx before 1st visit                      | tblBasic   | Yes       | Yes     | Yes        | No                          |
| <i>aids_date</i>                 | AIDS dx date (if <i>aids_y</i> =1)            | tblBasic   | Yes       | Yes     | Yes        | No                          |
| <i>cdstage</i> <sup>a</sup>      | CDC Stage at enrollment                       | tblBasic   | Yes       | Yes     | No         | Yes                         |
| <i>whostage</i> <sup>a</sup>     | WHO Stage at enrollment                       | tblBasic   | Yes       | Yes     | No         | Yes                         |
| <i>aids_cl_y</i> <sup>a</sup>    | Clinical AIDS dx before 1st visit             | tblBasic   | No        | No      | Yes        | No                          |
| <i>aids_cl_date</i> <sup>a</sup> | Clinical AIDS dx date (if <i>aids_y</i> =1)   | tblBasic   | No        | No      | Yes        | No                          |
| <i>death_y</i>                   | Did patient pass away?                        | tblFollow  | Yes       | Yes     | Yes        | Yes                         |
| <i>death_date</i>                | Death date (if <i>death_y</i> =1)             | tblFollow  | Yes       | Yes     | Yes        | Yes                         |
| <i>drop_date</i>                 | Date patient dropped from cohort              | tblFollow  | Yes       | Yes     | Yes        | No                          |
| <i>visit_date</i>                | Clinical encounter date                       | tblVisit   | Yes       | Yes     | Yes        | Yes                         |
| <i>cdstage</i>                   | CDC Stage                                     | tblVisit   | Yes       | Yes     | Yes        | No                          |
| <i>whostage</i>                  | WHO Stage                                     | tblVisit   | Yes       | Yes     | Yes        | No                          |
| <i>cd4_date</i>                  | Date of CD4 lab test                          | tblLab.CD4 | Yes       | Yes     | Yes        | Yes                         |
| <i>cd4</i>                       | CD4 count value                               | tblLab.CD4 | Yes       | Yes     | Yes        | Yes                         |
| <i>rna_date</i>                  | Date of RNA lab test                          | tblLab.RNA | Yes       | Yes     | Yes        | Yes                         |
| <i>rna</i>                       | RNA value                                     | tblLab.RNA | Yes       | Yes     | Yes        | Yes                         |
| <i>art_start</i>                 | Date of ART drug start                        | tblART     | Yes       | Yes     | Yes        | Yes                         |
| <i>art_end</i>                   | Date of ART drug end                          | tblART     | Yes       | Yes     | Yes        | Yes                         |
| <i>art_name</i>                  | Code representing ART drug(s)                 | tblART     | Yes       | Yes     | Yes        | Yes                         |
| <i>ce_date</i>                   | Date of clinical outcome                      | tblCE      | Yes       | Yes     | Yes        | No                          |
| <i>base_sex</i>                  | Gender at birth (0-Female, 1-Male, 9-Unknown) | Derived    | Yes       | Yes     | Yes        |                             |
| <i>base_mode</i>                 | Probable Mode of Infection                    | Derived    | Yes       | Yes     | Yes        |                             |
| <i>base_year</i>                 | Year of ART initiation                        | Derived    | Yes       | Yes     | Yes        |                             |
| <i>base_age</i>                  | Age at ART initiation                         | Derived    | Yes       | Yes     | Yes        |                             |
| <i>base_ADE</i>                  | Clinical AIDS at ART initiation               | Derived    | Yes       | Yes     | Yes        |                             |
| <i>base_ARTregimen</i>           | 1st ART regimen                               | Derived    | Yes       | Yes     | Yes        |                             |
| <i>base_CD4</i>                  | CD4 cell count at ART initiation              | Derived    | Yes       | Yes     | Yes        |                             |
| <i>base_nadirCD4</i>             | Lowest CD4 cell count prior to ART initiation | Derived    | Yes       | Yes     | Yes        |                             |
| <i>base_VL</i>                   | Viral load at ART initiation                  | Derived    | Yes       | Yes     | Yes        |                             |
| <i>base_VLundetectable</i>       | Undetectable VL at ART initiation             | Derived    | Yes       | Yes     | Yes        |                             |
| <i>event_death</i>               | Did patient pass away?                        | Derived    | Yes       | Yes     | Yes        |                             |
| <i>event_ADE</i>                 | Did patient have post-ART clinical outcome?   | Derived    | Yes       | Yes     | Yes        |                             |
| <i>time_follow</i>               | Time from ART initiation to death/censoring   | Derived    | Yes       | Yes     | Yes        |                             |
| <i>time_ADE</i>                  | Time from ART initiation to ADE/censoring     | Derived    | Yes       | Yes     | Yes        |                             |

The data protocol further defining variables is available at <https://www.ccasanet.org/resources/>.

<sup>a</sup> In 2014, the data transfer protocol pertaining to clinical AIDS status at enrollment was updated. Certain variables were deprecated in tblBasic and replaced with new variables. These variables are not included in comparisons of pre-audit and post-audit datasets.

Supplemental Table 2: Overview of audit frequency by site.

| Site    | Audited<br>N(%) | Not Audited<br>N(%) | Total |
|---------|-----------------|---------------------|-------|
| Site A  | 31 (89%)        | 4 (11%)             | 35    |
| Site B  | 12 (57%)        | 9 (43%)             | 21    |
| Site C  | 31 (52%)        | 29 (48%)            | 60    |
| Site D  | 34 (97%)        | 1 (3%)              | 35    |
| Site E  | 28 (80%)        | 7 (20%)             | 35    |
| Site F  | 30 (100%)       | 0 (0%)              | 30    |
| Site G  | 30 (100%)       | 0 (0%)              | 30    |
| Site H  | 24 (69%)        | 11(31%)             | 35    |
| Site I  | 30 (86%)        | 5 (14%)             | 35    |
| Overall | 250             | 66                  | 316   |

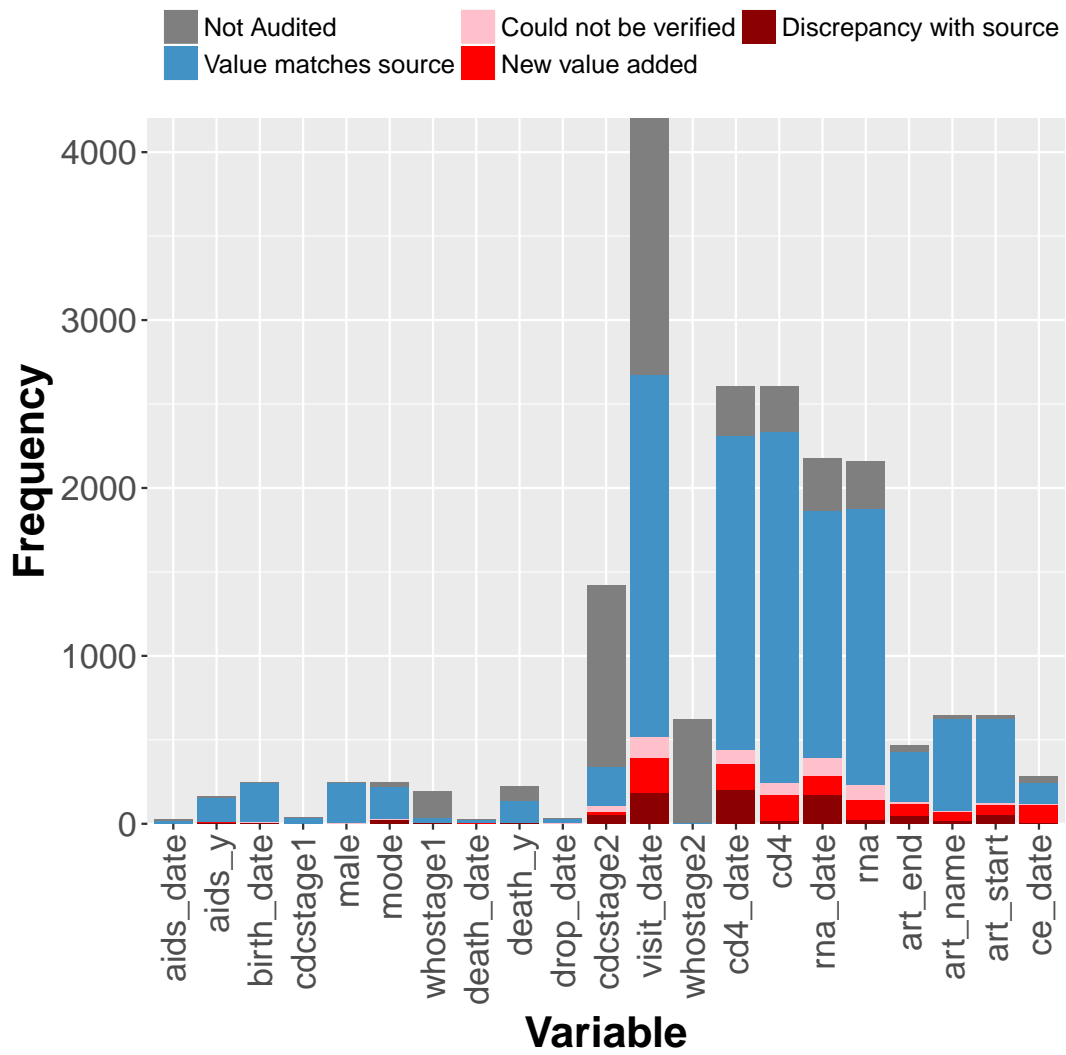

Supplemental Figure 1: Summary of reported audit findings for all audited variables.

Supplemental Table 3: Auditing results for each variable entry.

| Form   | Variable          | Total Entries | Not audited | Total Audited | Value matches source A1 | Discrepancy with source A2 + A3 | New value added A4 | Could not be verified A5 | Error Rate $(A2+A3+A4+A5)/(A1+A2+A3+A4+A5)$ |
|--------|-------------------|---------------|-------------|---------------|-------------------------|---------------------------------|--------------------|--------------------------|---------------------------------------------|
| basic  | <i>male</i>       | 250           | 5           | 245           | 242                     | 2                               | 0                  | 1                        | 1.2%                                        |
|        | <i>cdcstage1</i>  | 35            | 0           | 35            | 34                      | 1                               | 0                  | 0                        | 2.9%                                        |
|        | <i>birth.date</i> | 250           | 4           | 246           | 237                     | 7                               | 0                  | 2                        | 3.7%                                        |
|        | <i>aids.y</i>     | 164           | 6           | 158           | 146                     | 9                               | 1                  | 2                        | 7.6%                                        |
|        | <i>mode</i>       | 250           | 28          | 222           | 192                     | 23                              | 0                  | 7                        | 13.5%                                       |
|        | <i>aids.date</i>  | 28            | 6           | 22            | 18                      | 1                               | 3                  | 0                        | 18.2%                                       |
|        | <i>whostage1</i>  | 192           | 157         | 35            | 27                      | 7                               | 0                  | 1                        | 22.9%                                       |
| follow | <i>death.y</i>    | 226           | 88          | 138           | 131                     | 5                               | 0                  | 2                        | 5.1%                                        |
|        | <i>drop.date</i>  | 30            | 0           | 30            | 25                      | 0                               | 4                  | 1                        | 16.7%                                       |
|        | <i>death.date</i> | 26            | 2           | 24            | 18                      | 0                               | 4                  | 2                        | 25.0%                                       |
| visit  | <i>whostage2</i>  | 623           | 616         | 7             | 7                       | 0                               | 0                  | 0                        | 0.0%                                        |
|        | <i>visit.date</i> | 4203          | 1529        | 2674          | 2157                    | 183                             | 211                | 123                      | 19.3%                                       |
|        | <i>cdcstage2</i>  | 1425          | 1084        | 341           | 232                     | 54                              | 16                 | 39                       | 32.0%                                       |
| cd4    | <i>cd4</i>        | 2607          | 273         | 2334          | 2090                    | 17                              | 155                | 72                       | 10.5%                                       |
|        | <i>cd4.date</i>   | 2607          | 292         | 2315          | 1875                    | 205                             | 155                | 80                       | 19.0%                                       |
| rna    | <i>rna.v</i>      | 2163          | 285         | 1878          | 1644                    | 27                              | 116                | 91                       | 12.5%                                       |
|        | <i>rna.date</i>   | 2175          | 314         | 1861          | 1471                    | 173                             | 113                | 104                      | 21.0%                                       |
| art    | <i>art.name</i>   | 644           | 18          | 626           | 546                     | 17                              | 56                 | 7                        | 12.8%                                       |
|        | <i>art.start</i>  | 645           | 21          | 624           | 496                     | 56                              | 57                 | 15                       | 20.5%                                       |
|        | <i>art.end</i>    | 467           | 36          | 431           | 298                     | 46                              | 73                 | 14                       | 30.9%                                       |
| ce     | <i>cc.date</i>    | 279           | 36          | 243           | 123                     | 10                              | 102                | 8                        | 49.4%                                       |
|        | <i>overall</i>    | 19289         | 4800        | 14489         | 12009                   | 843                             | 1066               | 571                      | 17.1%                                       |

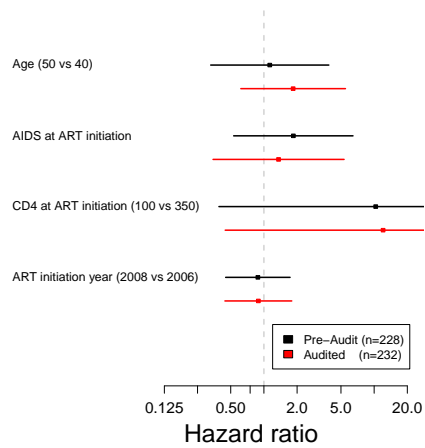

(a) Mortality

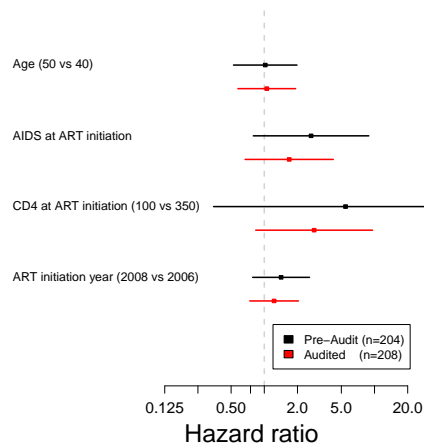

(b) AIDS-defining event

Supplemental Figure 2: Adjusted hazard ratios of mortality (a) and AIDS-defining event (b) for patients in the pre-audit and audited datasets.

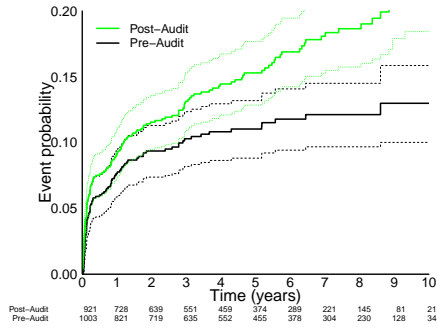

(a) Site 1

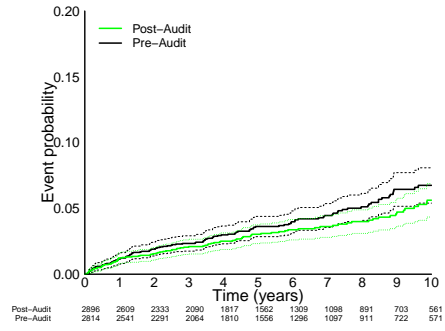

(b) Site 2

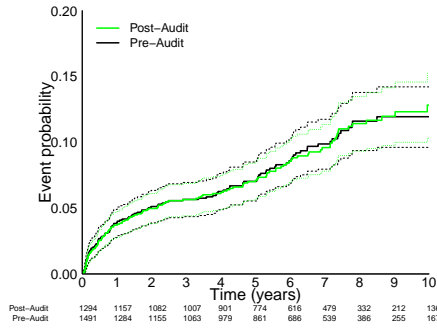

(c) Site 3

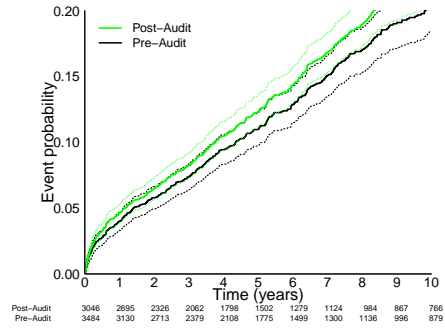

(d) Site 4

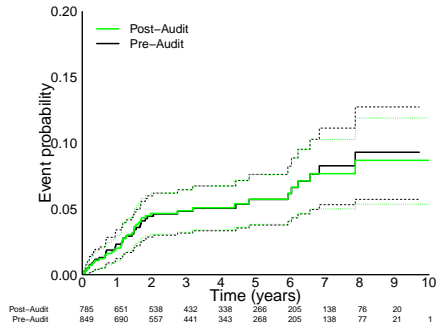

(e) Site 5

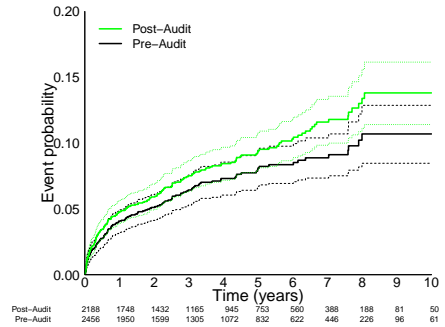

(f) Site 6

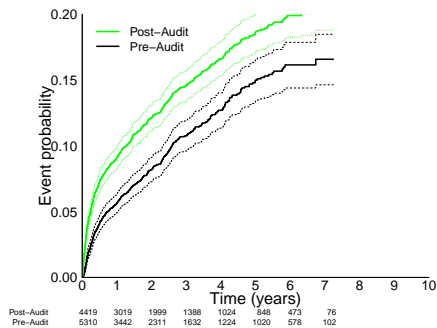

(g) Site 7

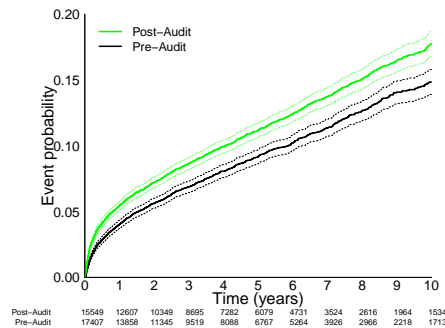

(h) Overall

Supplemental Figure 3: Estimated cumulative incidence of death by site for patients in the pre-audit and post-audit datasets. Solid lines denote the estimated incidence and dotted lines denote the corresponding 95% confidence intervals.

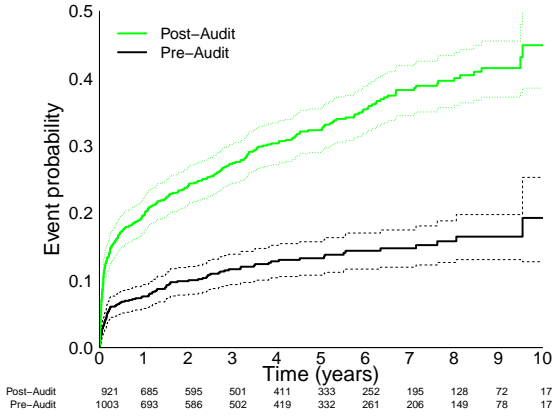

(a) Site 1

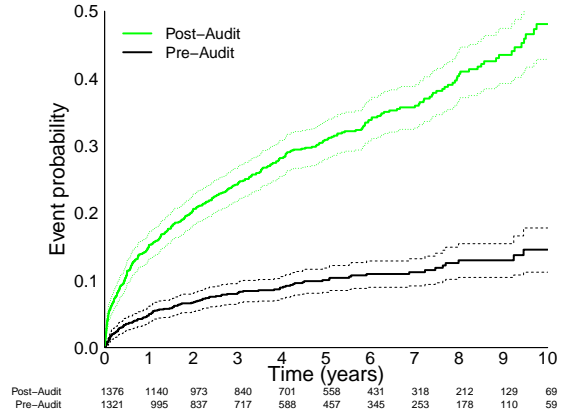

(b) Site 2

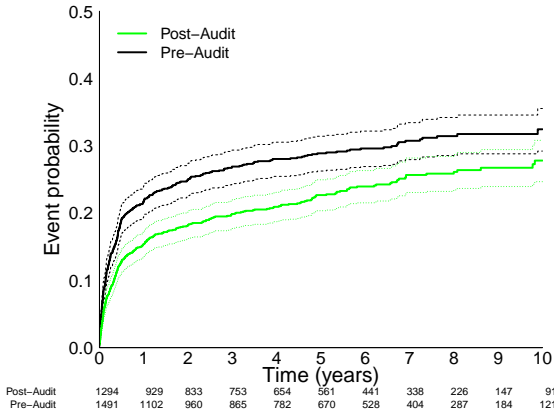

(c) Site 3

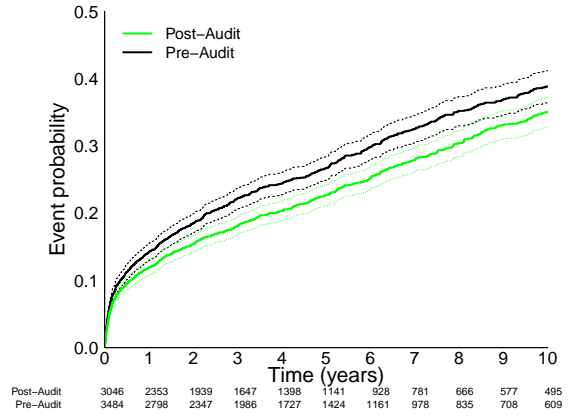

(d) Site 4

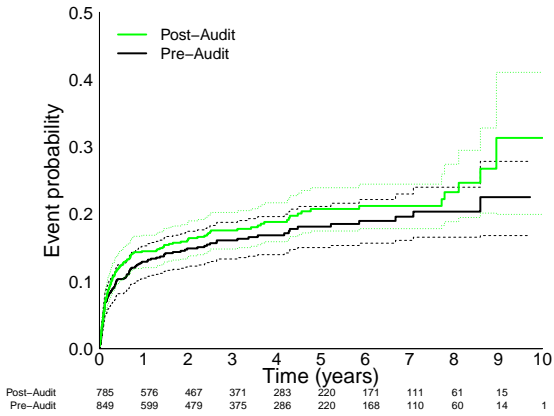

(e) Site 5

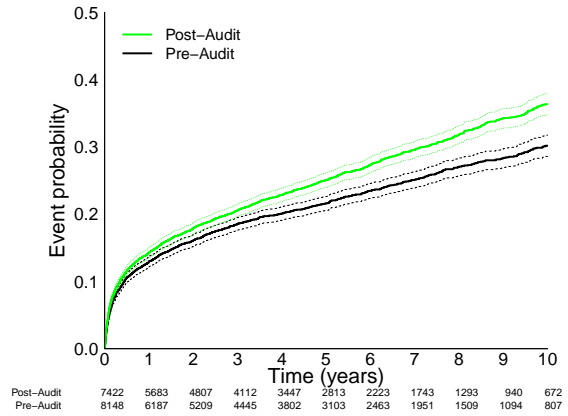

(f) Overall

Supplemental Figure 4: Estimated cumulative incidence of an AIDS-defining event by site for patients in the pre-audit and post-audit datasets. Solid lines denote the estimated incidence and dotted lines denote the corresponding 95% confidence intervals.



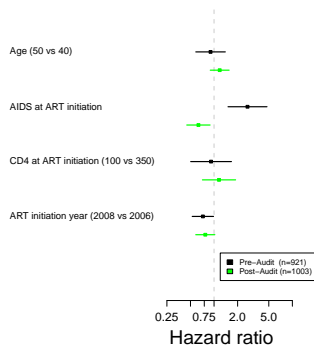

(a) Site 1

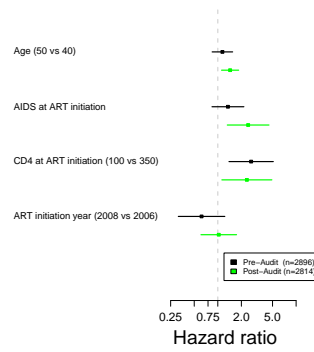

(b) Site 2

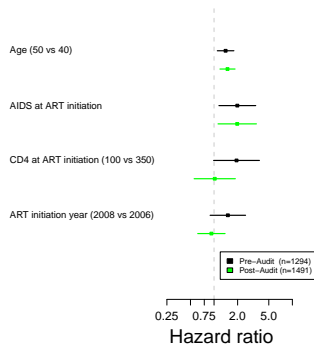

(c) Site 3

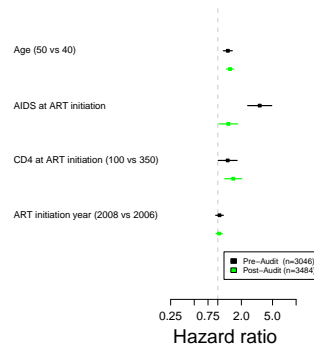

(d) Site 4

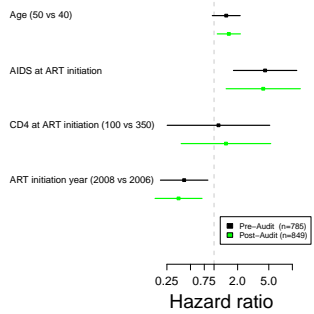

(e) Site 5

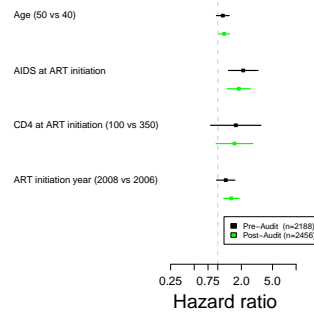

(f) Site 6

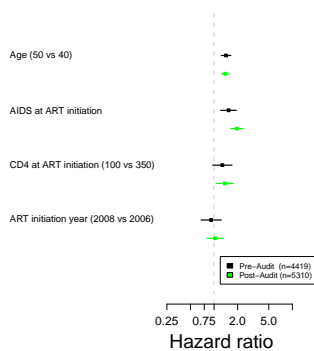

(g) Site 7

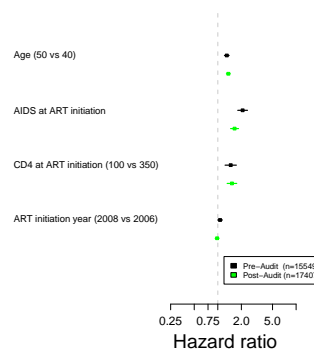

(h) Overall

Supplemental Figure 5: Association between patient characteristics at baseline and hazard of death by site using pre-audit and post-audit data. The dots denote the estimated incidence and the lines denote the corresponding 95% confidence intervals.

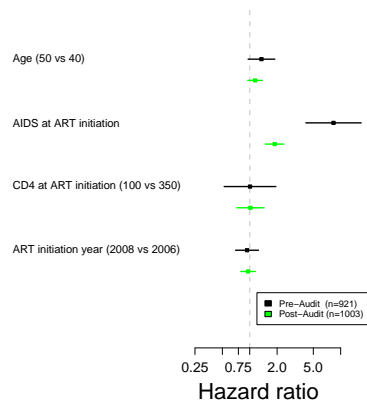

(a) Site 1

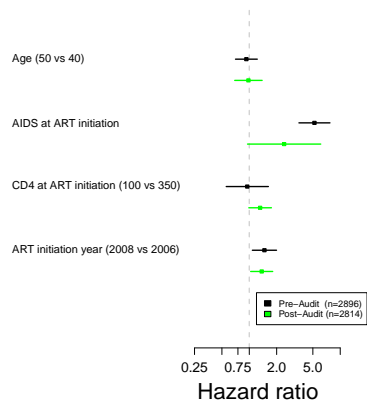

(b) Site 2

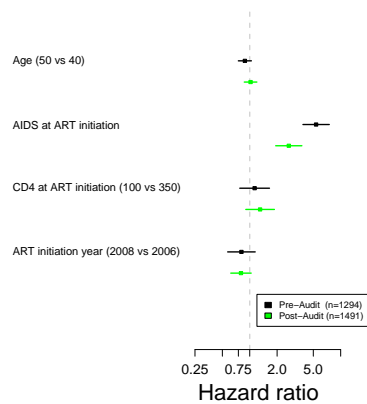

(c) Site 3

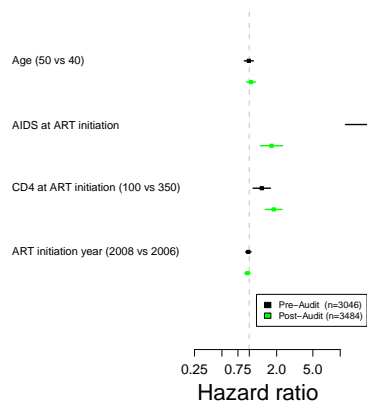

(d) Site 4

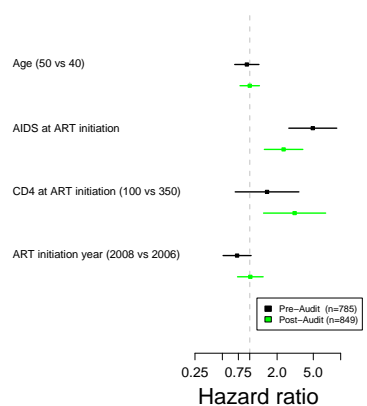

(e) Site 5

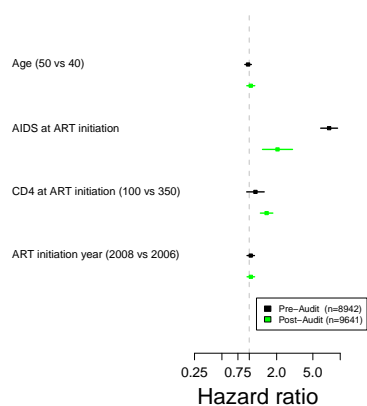

(f) Overall

Supplemental Figure 6: Association between patient characteristics at baseline and hazard of an AIDS-defining event by site using pre-audit and post-audit data. The dots denote the estimated incidence and the lines denote the corresponding 95% confidence intervals.
